# Supplementary material for: Flood drivers and trends: a case study of the Geul River catchment (the Netherlands) over the past half century
Source: Copernicus journal article supplement (doi:10.5194/hess-28-3327-2024), 2024-07-26
Supplement: Supplementary file 1 [file hess-28-3327-2024-supplement.pdf]

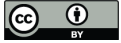

*Supplement of*

## **Flood drivers and trends: a case study of the Geul River catchment (the Netherlands) over the past half century**

**Athanasios Tsiokanos et al.**

*Correspondence to:* Athanasios Tsiokanos ([athanasios.tsiokanos@deltares.nl](mailto:athanasios.tsiokanos@deltares.nl))

The copyright of individual parts of the supplement might differ from the article licence.

# S1 Sensitivity of the extreme discharge event-based analysis to $P_{MD}$ duration

**Table S1:** Mean relative frequencies for all stations of high flow events preceded by the defined extreme precipitation indicators for different  $P_{MD}$  accumulation periods.

| $P_{MD}$ duration | $P_{99}$ [%] | $P_{MD}$ [%] | $P_{WAC}$ [%] | Compound I [%] | Compound II [%] | Compound III [%] |
|-------------------|--------------|--------------|---------------|----------------|-----------------|------------------|
| 4-day             |              | 74.7         |               |                | 40.0            | 12.6             |
| 5-day             |              | 65.3         |               |                | 38.4            | 12.2             |
| 6-day             |              | 64.5         |               |                | 39.6            | 12.2             |
| 7-day             | 27.7         | 61.6         | 47.8          | 12.6           | 39.6            | 12.2             |
| 8-day             |              | 57.9         |               |                | 38.4            | 12.6             |
| 9-day             |              | 61.2         |               |                | 41.6            | 12.6             |
| 10-day            |              | 58.4         |               |                | 39.2            | 12.6             |

## S2 Multi-temporal trend analysis

### S2.1 Winter half-year

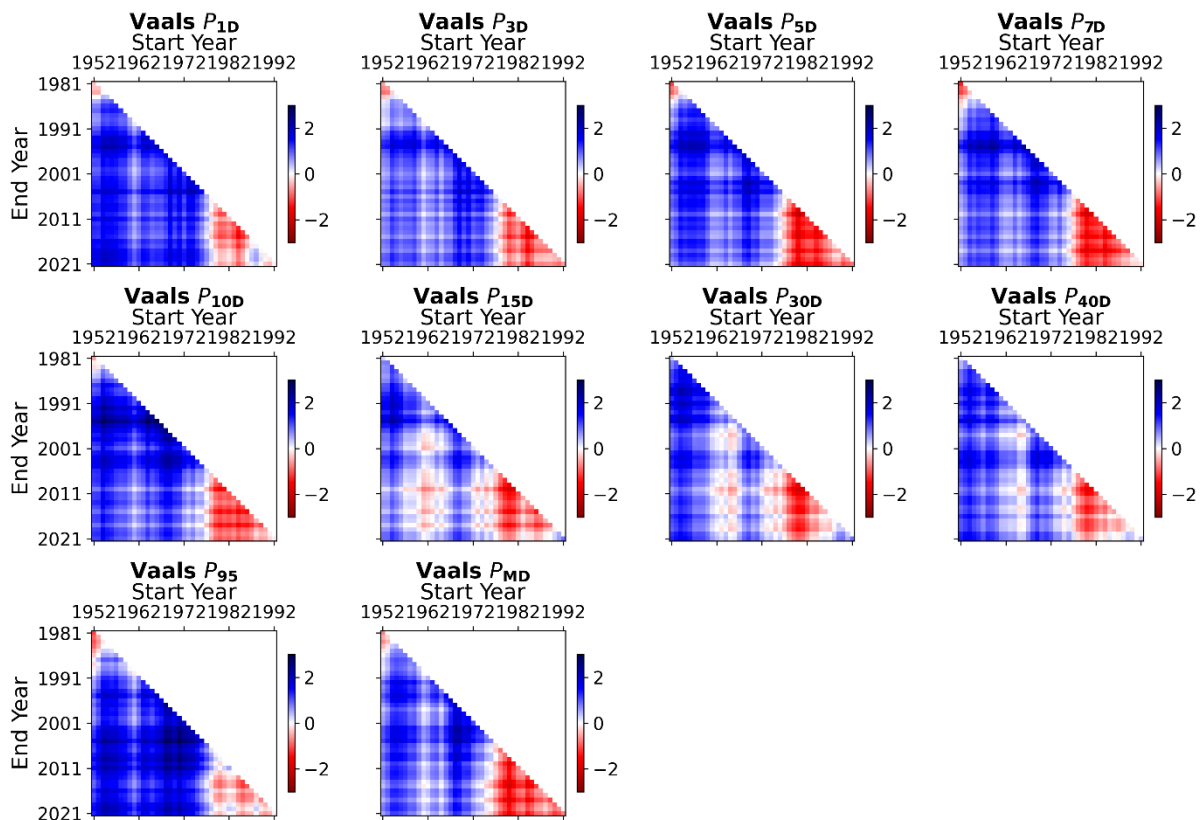

**Figure S1.** Multi-temporal trend analysis for the developed (extreme) precipitation indices at Vaals for winter half-year. Each pixel presents a fixed period, and the color indicates the resulted Z-statistic value using the Mann-Kendall test.

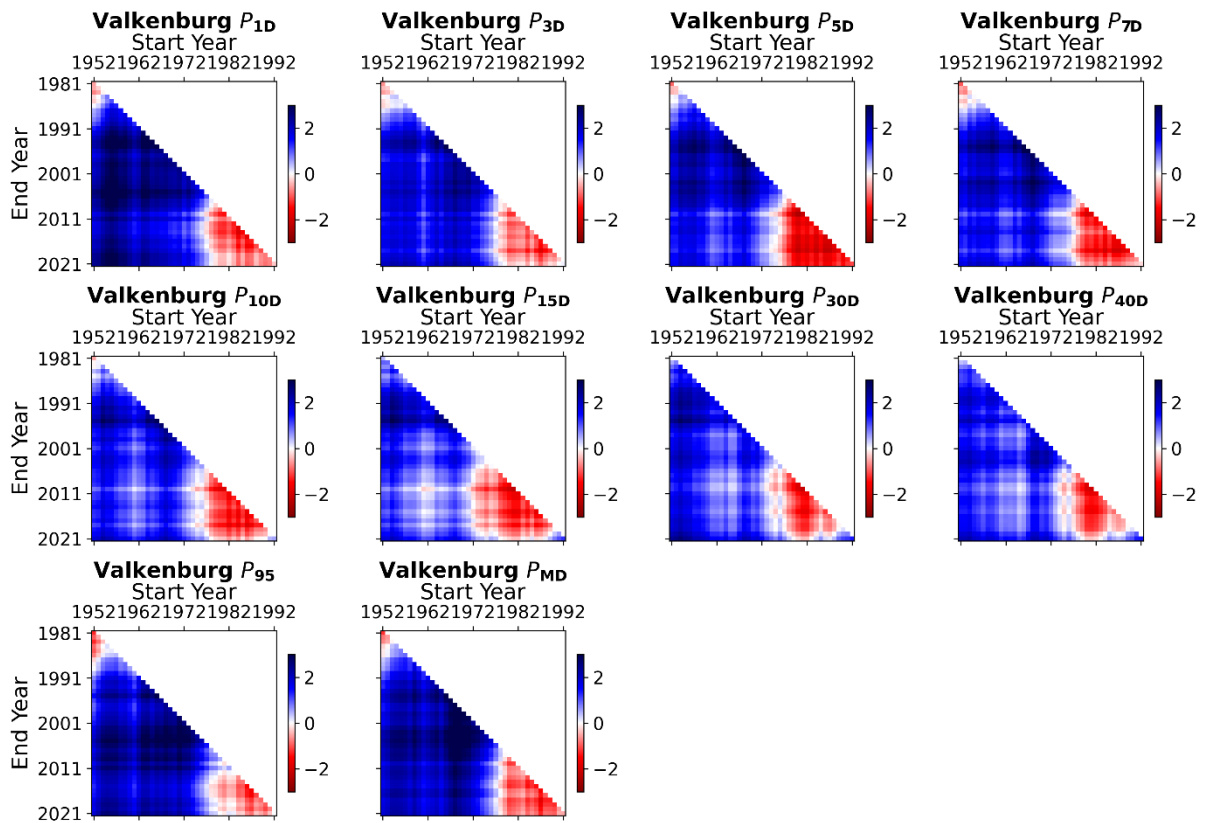

**Figure S2.** Multi-temporal trend analysis for the developed (extreme) precipitation indices at Valkenburg for winter half-year. Each pixel presents a fixed period, and the color indicates the resulted Z-statistic value using the Mann-Kendall test.

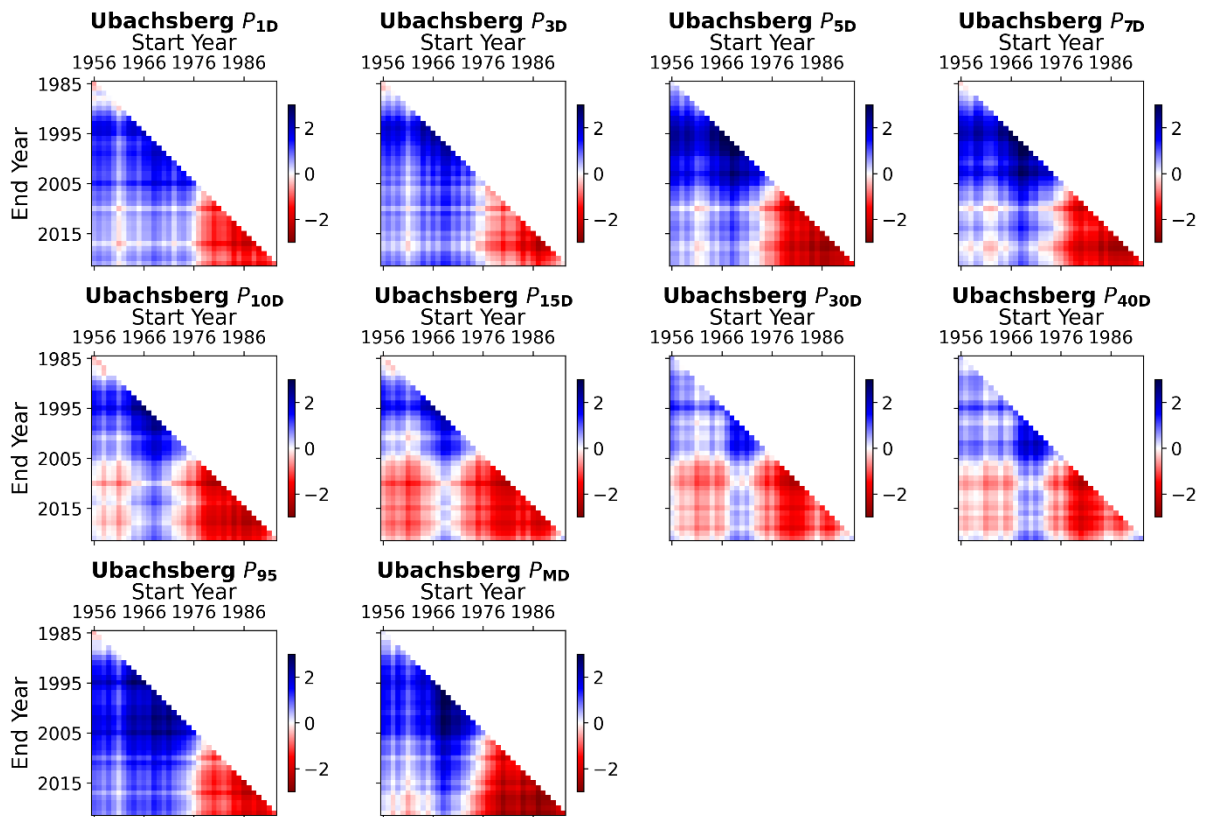

**Figure S3.** Multi-temporal trend analysis for the developed (extreme) precipitation indices at Ubachsberg for winter half-year. Each pixel presents a fixed period, and the color indicates the resulted Z-statistic value using the Mann-Kendall test.

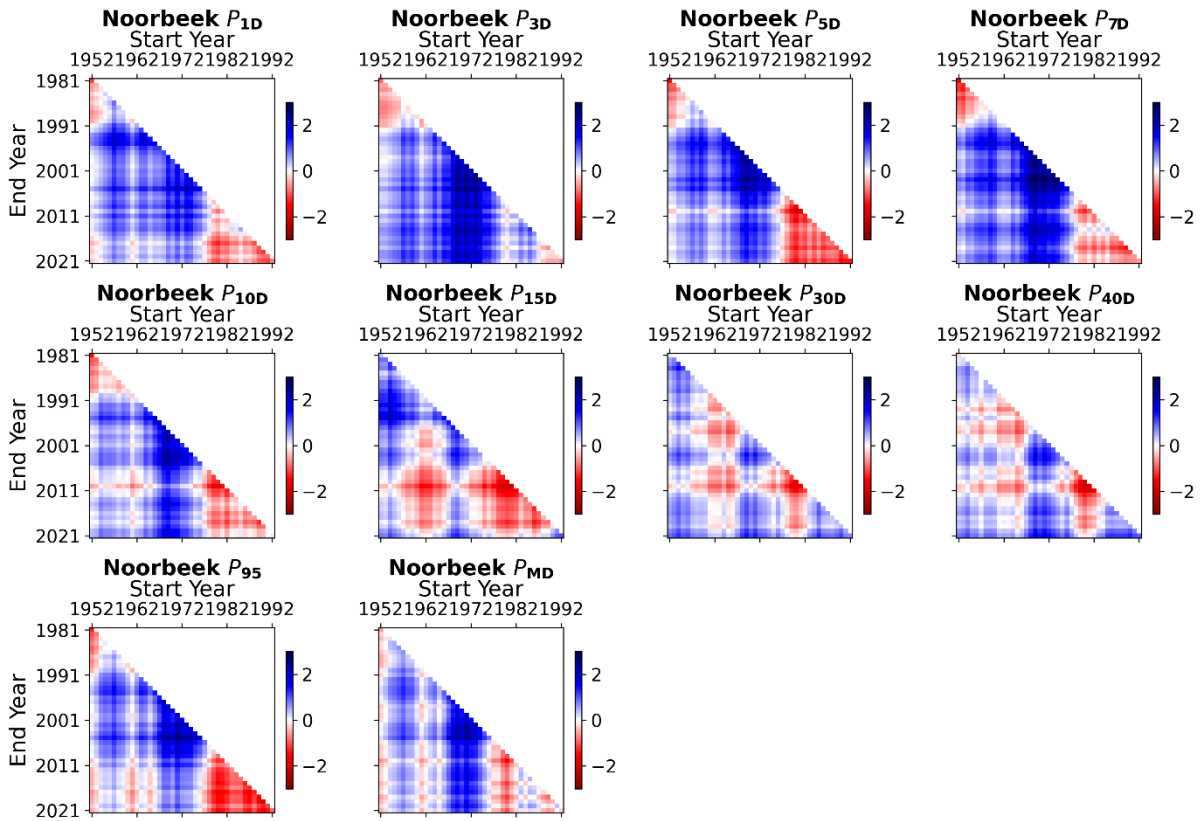

**Figure S4.** Multi-temporal trend analysis for the developed (extreme) precipitation indices at Noorbeek for winter half-year. Each pixel presents a fixed period, and the color indicates the resulted Z-statistic value using the Mann-Kendall test.

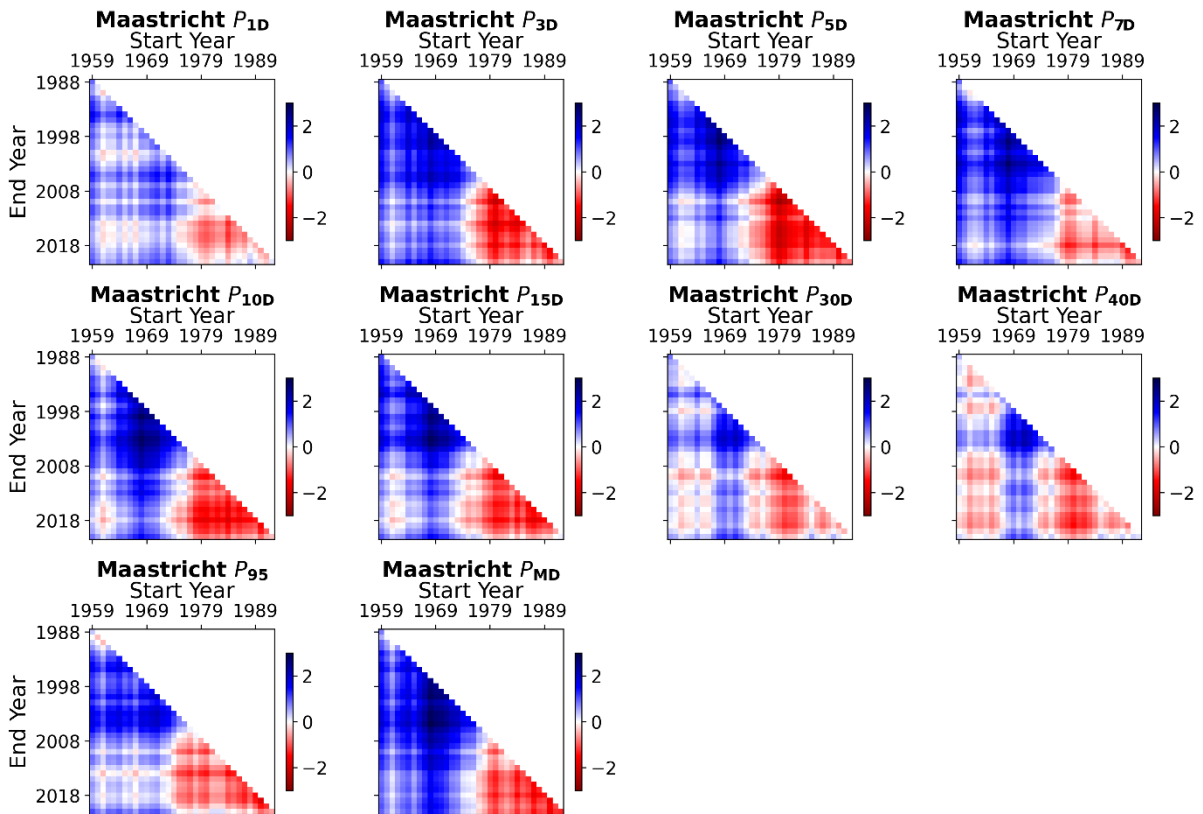

**Figure S5.** Multi-temporal trend analysis for the developed (extreme) precipitation indices at Maastricht for winter half-year. Each pixel presents a fixed period, and the color indicates the resulted Z-statistic value using the Mann-Kendall test.

## S2.2 Summer half-year

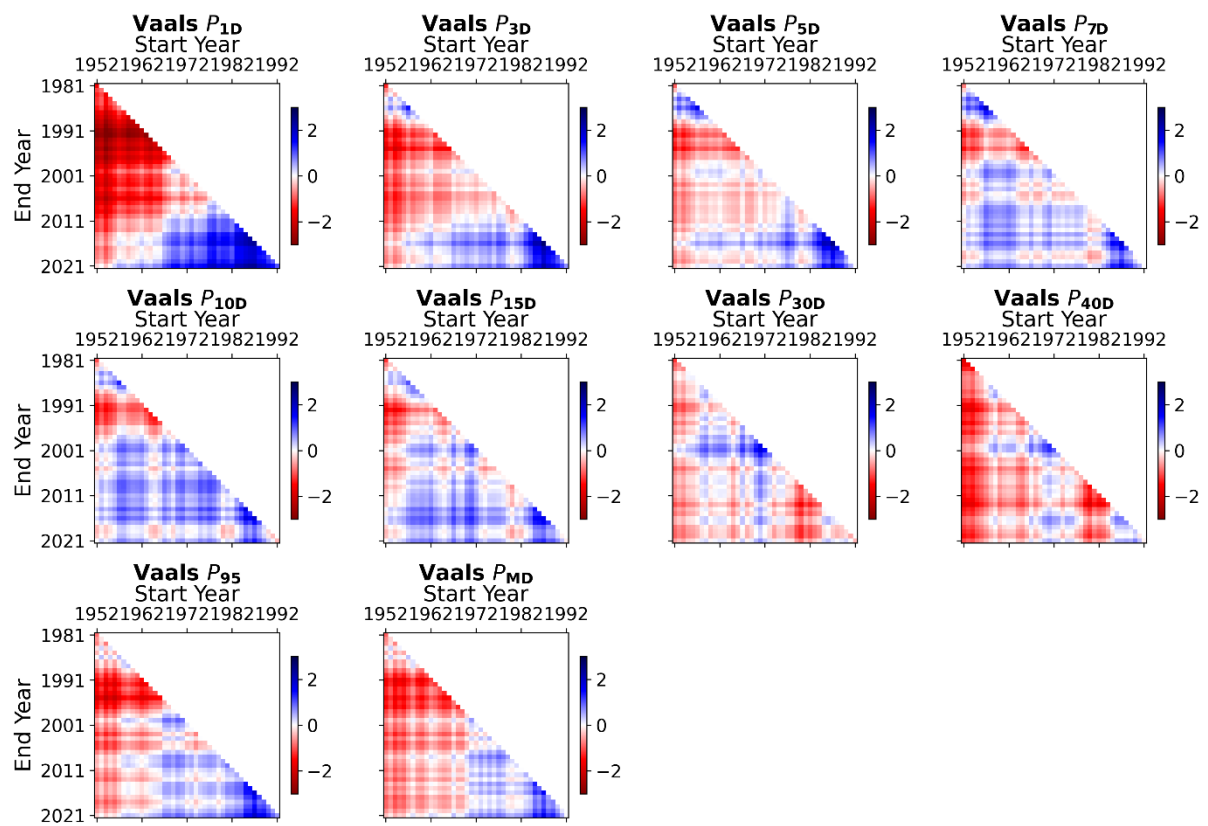

**Figure S6.** Multi-temporal trend analysis for the developed (extreme) precipitation indices at Vaals for summer half-year. Each pixel presents a fixed period, and the color indicates the resulted Z-statistic value using the Mann-Kendall test.

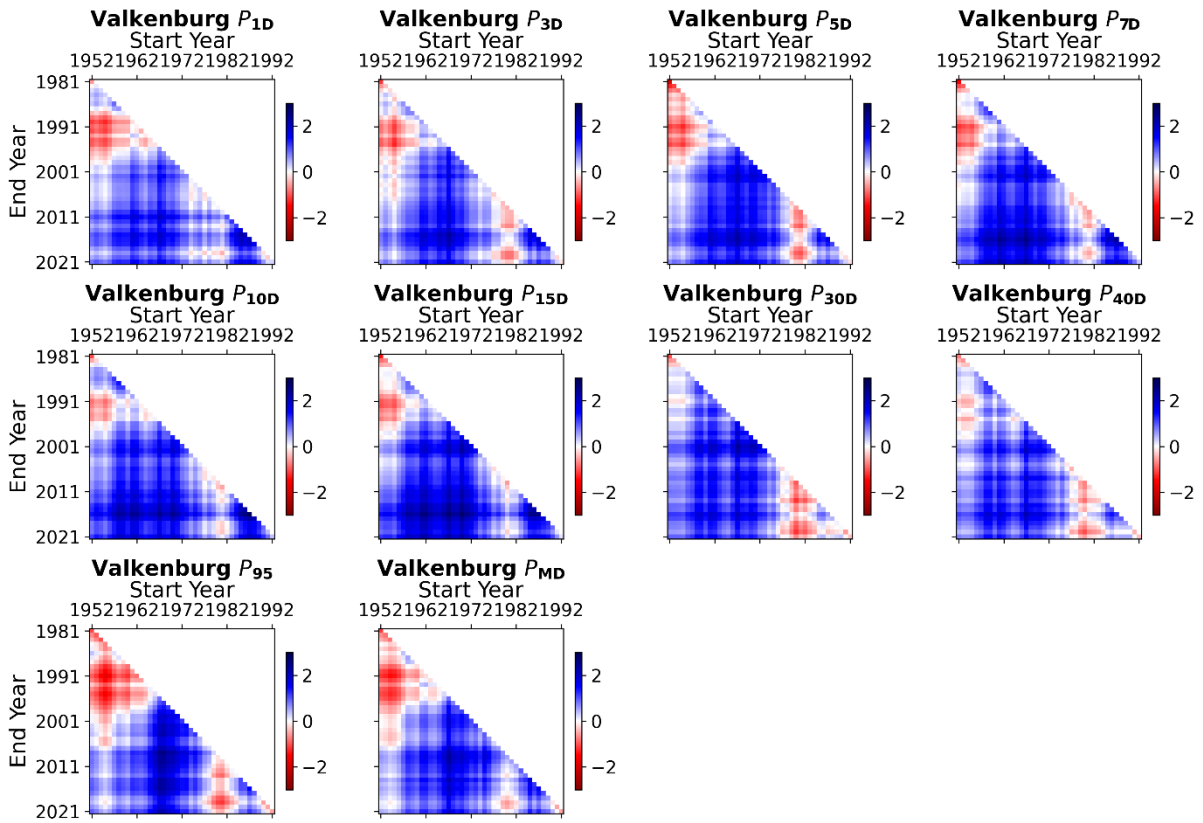

Figure S7. Multi-temporal trend analysis for the developed (extreme) precipitation indices at Valkenburg for summer half-year. Each pixel presents a fixed period, and the color indicates the resulted Z-statistic value using the Mann-Kendall test.

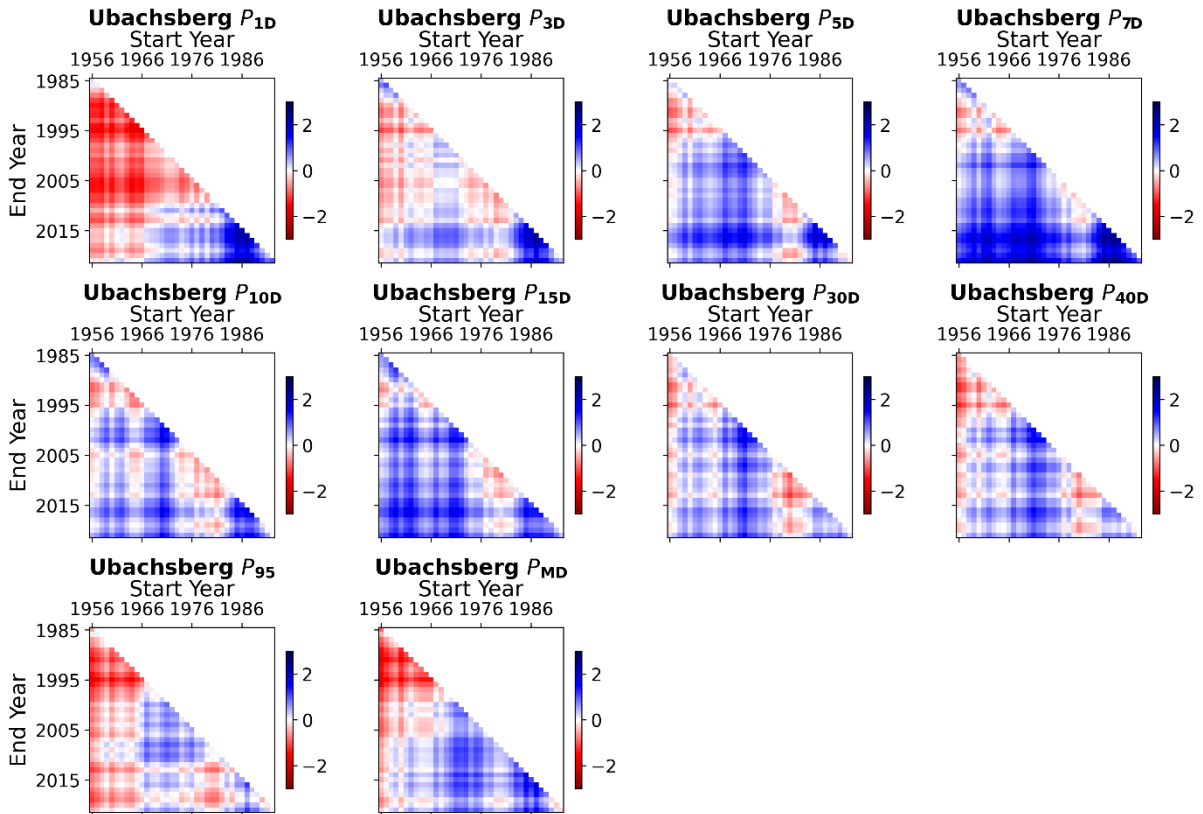

Figure S8. Multi-temporal trend analysis for the developed (extreme) precipitation indices at Ubachsberg for summer half-year. Each pixel presents a fixed period, and the color indicates the resulted Z-statistic value using the Mann-Kendall test.

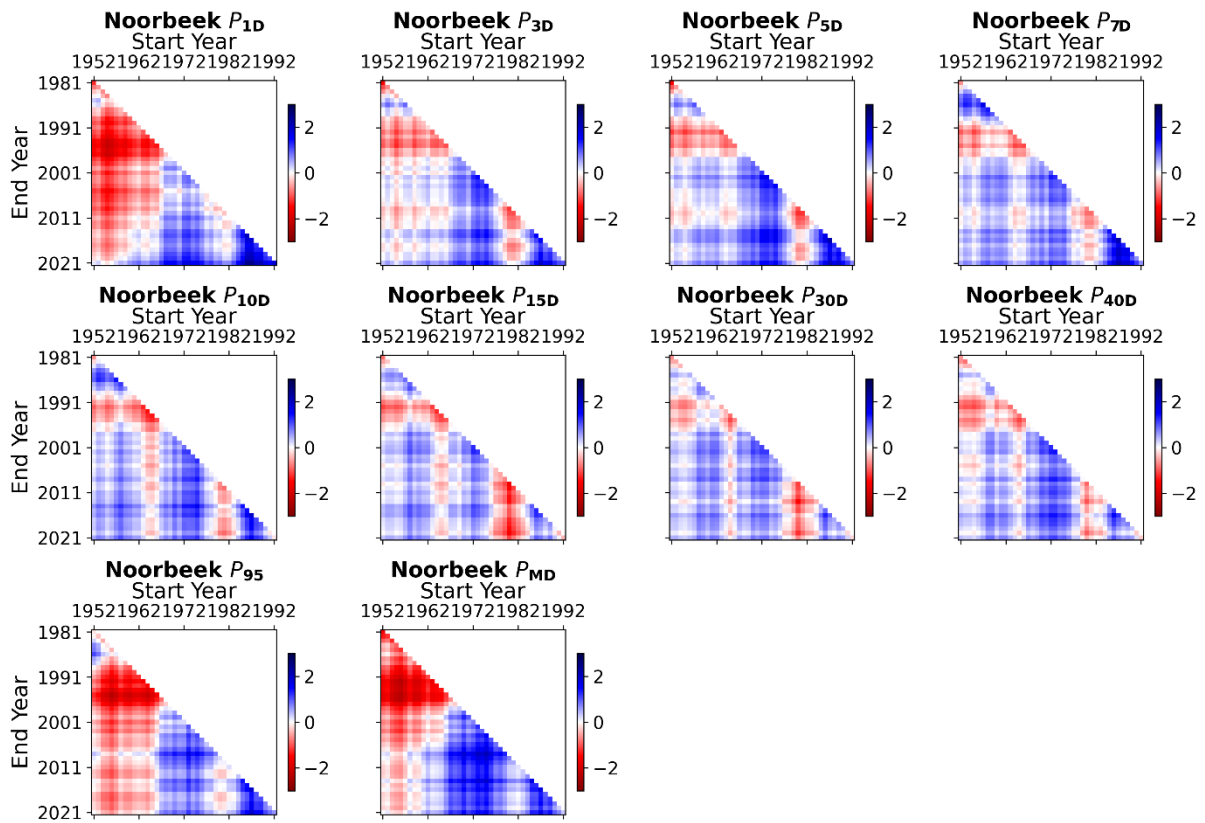

**Figure S9.** Multi-temporal trend analysis for the developed (extreme) precipitation indices at Noorbeek for summer half-year. Each pixel presents a fixed period, and the color indicates the resulted Z-statistic value using the Mann-Kendall test.

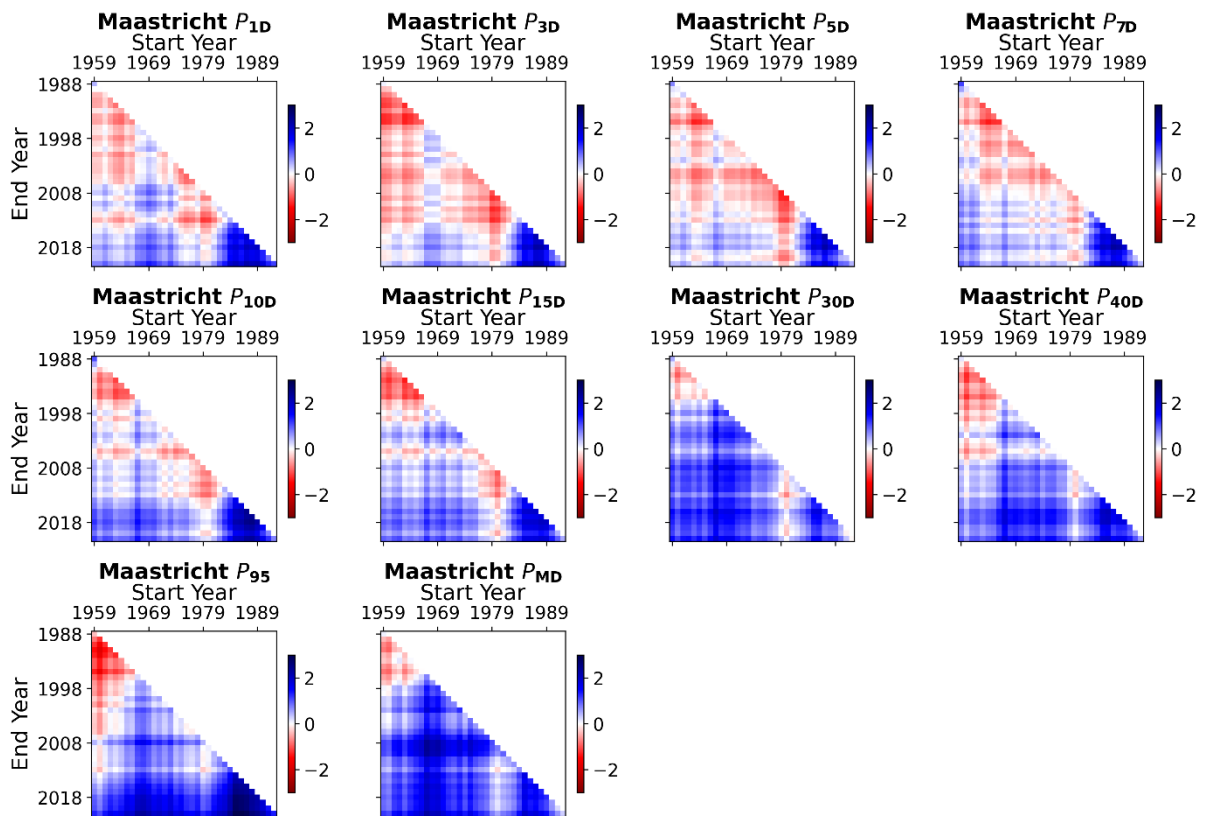

**Figure S10.** Multi-temporal trend analysis for the developed (extreme) precipitation indices at Maastricht for summer half-year. Each pixel presents a fixed period, and the color indicates the resulted Z-statistic value using the Mann-Kendall test.
